# Supplementary material for: Future Healers: Assessing Interests in Health Professions among Younger Individuals from Rural &amp; Urban Communities
Source: Research Square preprint supplement (doi:10.21203/rs.3.rs-8502425/v1), 2026-01-20
Supplement: Supplementary file 1 [file 2094acc39d799a9b2e13aaa5.docx]

Future Healers: Assessing Interests in Health Professions among Younger Individuals from Rural & Urban Communities

**Qualtrics Research Survey**

Block: Default Question Block (8 Questions)

Standard: Gift Card Raffle Link (1 Question)

| Page Break |  |
| --- | --- |

Start of Block: Default Question Block

**Future Healers: Assessing Interest in Health Professions among Younger Individuals from Rural & Urban Communities**

**Researchers: Anthony M. Stultz & Erica Ausel, Ph.D**

We’re inviting you to take a survey for research. This survey is completely voluntary. There are no negative consequences if you don’t want to take it. If you start the survey, you can always change your mind and stop at any time.

**What is the purpose of this study?** The purpose of this study is to gain a clearer understanding of what backgrounds and experiences lead students to pursue careers in the health professions.

**What will I do?**Interpret the results and determine if there is a correlation between students’ backgrounds and experiences and their motives for pursuing a career in the health professions. **Risks:** - There are little to no risks involved with this survey.

- Online data being hacked or intercepted: Anytime you share information online there are risks. We’re using a secure system to collect this data, but we can’t completely eliminate this risk.  – Breach of confidentiality: There is a chance your data could be seen by someone who shouldn’t have access to it.   We’re minimizing this risk in the following ways: This survey is completely anonymous, but if you wish to opt-in for a chance to win a **$100 Amazon Gift Card**, there will be an additional link on the survey to provide your school’s email address.

**Possible benefits**: You may win a**$100 Amazon Gift Card!** There are a total of 12 Indiana institutions that the survey is being sent out to.

How long will it take? **About 7 minutes**

**Compensation**: If you choose, you will be redirected to a secondary survey to enter your school email address for a chance to win a $100 Amazon gift card at the end of the survey. Estimated participation is approximately 200-300 students. 1 in 100 student will receive the gift card.

Future research: De-identified data (all identifying information removed) may be shared with other researchers. You won’t be told specific details about these future research studies.

**Funding source:** No funding is disclosed for this research.

**Confidentiality and Data Security:** Unless you opt to submit your student email address via a secondary survey to enter the raffle, no identifying information will be collected.

**Where will data be stored?** On the servers for the online survey software (Qualtrics) and the researcher’s computer, each secured by a password. How long will it be kept? Until the completion of this project.

**Who can see my data?**• We (the researchers) will have access de-identified collected in this survey. This is so we can analyze the data and conduct the study. • We may share our findings in publications or presentations. If we do, the results will be aggregate (grouped) data, with no individual results.

**Questions about the research, complaints, or problems:  Contact Anthony M. Stultz at astultz356@marian.edu.**

Questions about your rights as a research participant, complaints, or problems: Contact the MU IRB (Institutional Review Board) at **IRB@marian.edu**. Please print or save this screen if you want to be able to access the information later.

**IRB #: [25.102]  IRB Approval Date: [01/22/2025]**

**Agreement to Participate: Your participation is completely voluntary, and you can withdraw at any time. By taking the survey, you consent to participate.**

| Page Break |  |
| --- | --- |

What best describes the location you grew up in?

- Rural Community (1)
- Small Town (2)
- Large Town (4)
- City (5)
- Other (6) __________________________________________________

What year are you in college?

- Freshman (4)
- Sophomore (6)
- Junior (7)
- Senior (8)
- Other (9) __________________________________________________

What career are you interested in going into?

________________________________________________________________

| Page Break |  |
| --- | --- |

|  | Strongly Disagree (1) | Disagree (2) | Agree (3) | Strongly Agree (4) |
| --- | --- | --- | --- | --- |
| The college courses you’ve taken have furthered your interest in entering healthcare. (1) |  |  |  |  |
| Growing up in your community has inspired you to pursue a healthcare career to serve similar areas. (2) |  |  |  |  |
| You chose a healthcare career to address the shortage of providers in your community. (3) |  |  |  |  |
| Family members working in healthcare influenced your decision to pursue a career in medicine. (4) |  |  |  |  |
| Growing up, your family encouraged you to pursue a career in healthcare. (5) |  |  |  |  |
| Caring for or having a sick family member influenced you to pursue a career in medicine. (6) |  |  |  |  |
| Individuals from rural communities are less likely to pursue careers in healthcare due to lack of resources. (7) |  |  |  |  |
| Individuals from rural communities are less likely to pursue careers in healthcare due to lack of information. (8) |  |  |  |  |

| Page Break |  |
| --- | --- |

Of the items below, order from most (top) to least (bottom) that most influenced your decision to enter a career in the health professions.

______ Personal health related experience (13)

______ Better my community (14)

______ College courses (15)

______ Health needs of a loved one (16)

______ Personal health experiences (17)

______ High school coures (18)

______ Personal drive (19)

______ Motivated by family (20)

______ Shortage of health professions (21)

______ Other (22)

| Page Break |  |
| --- | --- |

How do you think your experiences in college have shaped your interest in wanting to pursue a career in medicine?

________________________________________________________________

What are some personal experiences with medicine that have motivated you to consider a career in healthcare?

________________________________________________________________

End of Block: Default Question Block

Start of Block: Gift Card Raffle Link

If you wish to enter a raffle for a chance to win a $100 Amazon Gift Card. Please Click Here!

End of Block: Gift Card Raffle Link
